# Supplementary material for: Role of WNT5A receptors FZD5 and RYK in prostate cancer cells
Source: PubMed Central journal article supplement (PMC6007469; doi:10.18632/oncotarget.25551), 2018-06-05
Supplement: oncotarget-09-27293-s001.pdf [file oncotarget-09-27293-s001.pdf]

## Role of WNT5A receptors FZD5 and RYK in prostate cancer cells

### SUPPLEMENTARY MATERIALS

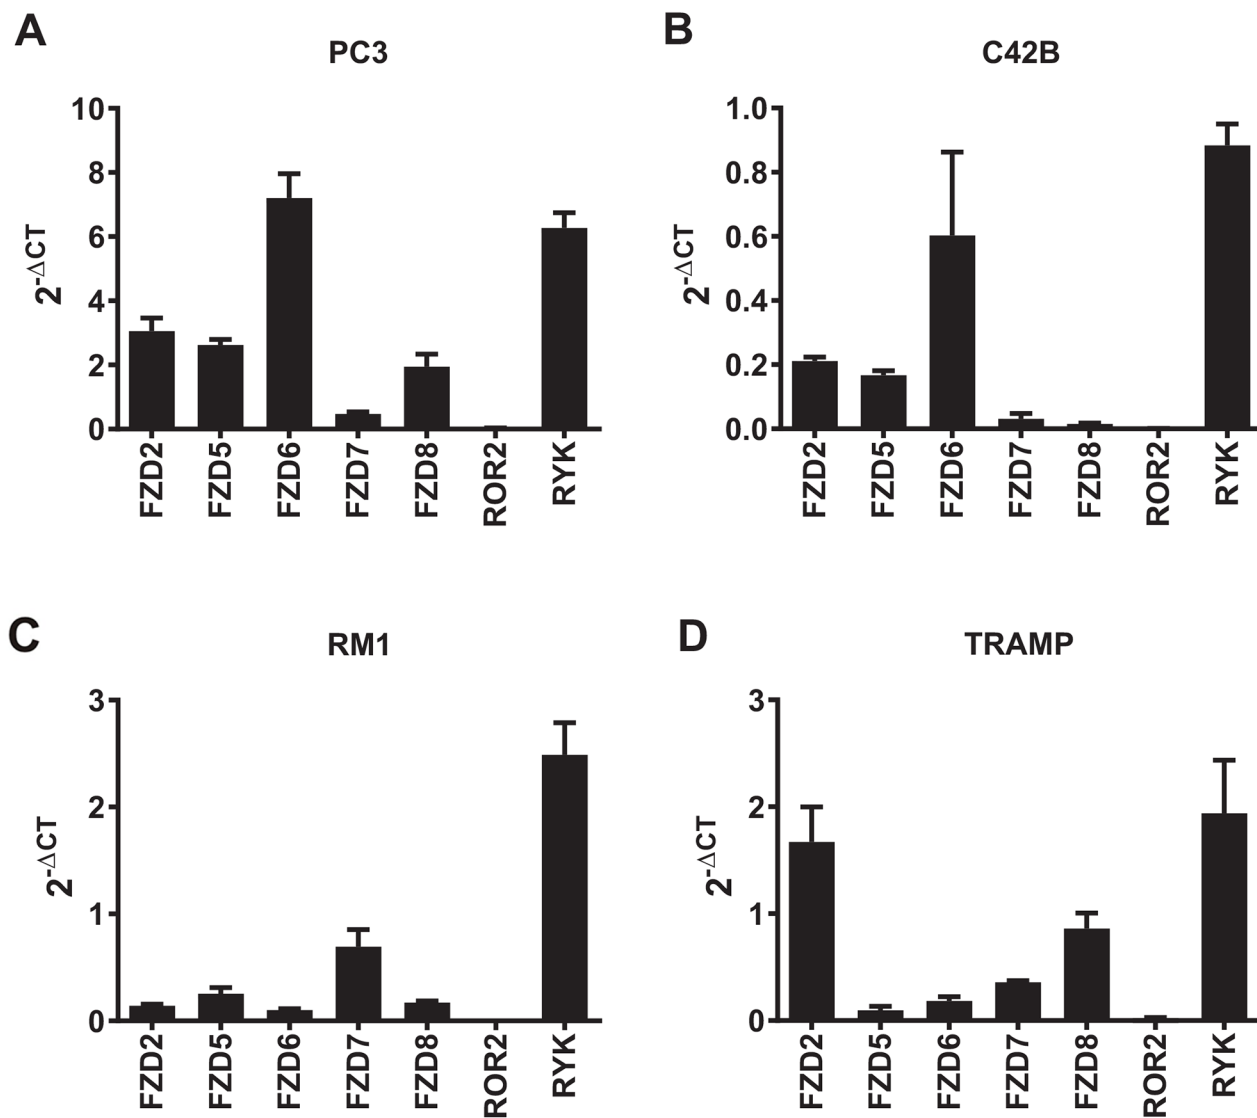

**Supplementary Figure 1: Expression of Wnt receptors in human and mouse prostate cancer cell lines.** (A-B) Expression of FZD2, FZD5, FZD6, FZD7, FZD8, ROR2, RYK in two different human prostate cancer cell lines PC3 and C4-2B. (C-D) Expression of Fzd2, Fzd5, Fzd6, Fzd7, Fzd8, Ror2, Ryk in two different murine prostate cancer cell lines RM1 and TRAMP-C2. The mRNA levels of receptor expression were analyzed by qPCR. Data are shown as  $2^{-\Delta CT}$  values as mean  $\pm$  SD.

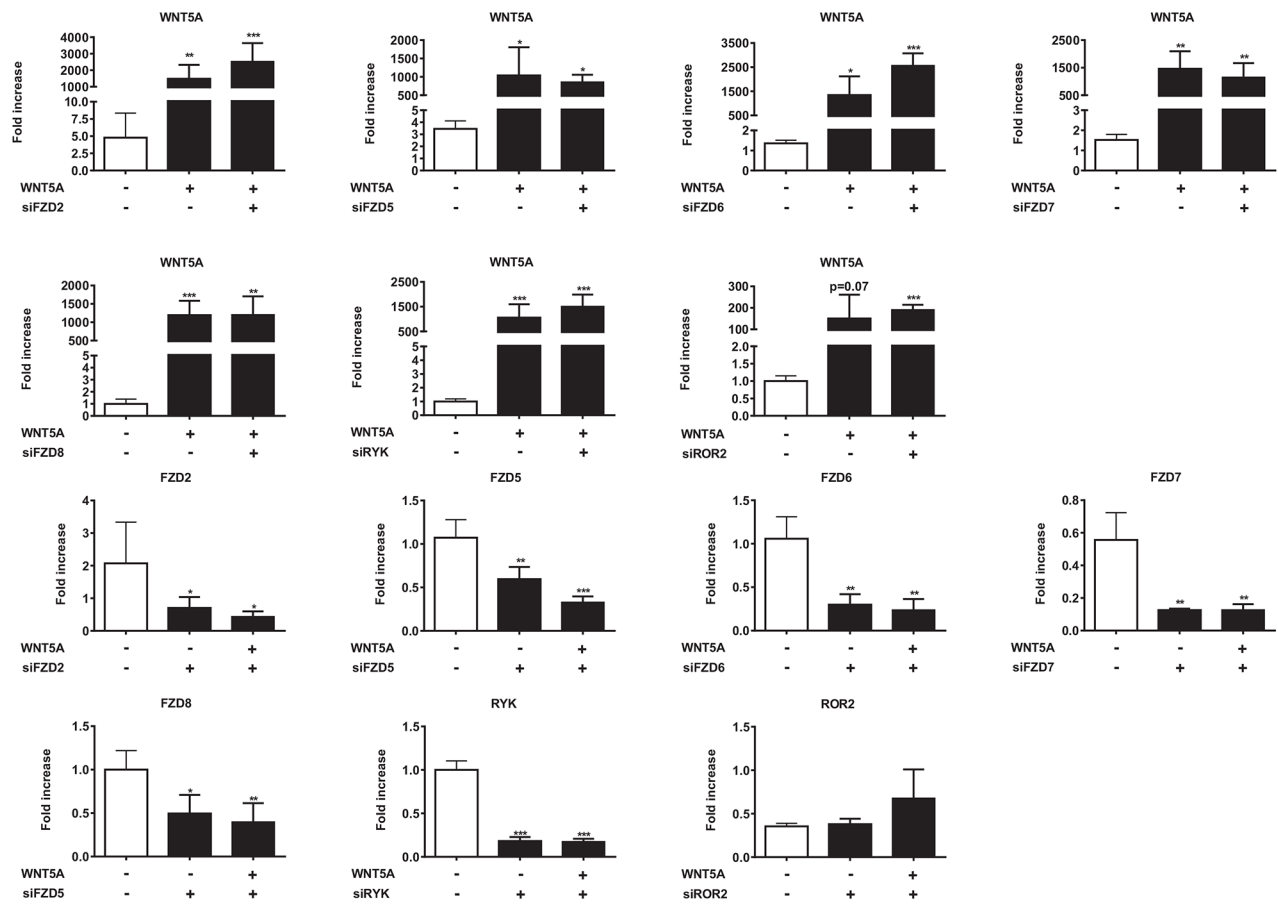

**Supplementary Figure 2: Validation of WNT5A overexpression and Wnt receptor knock-downs.** PC3 cells were either single treated using siRNAs (siFZD2, siFZD5, siFZD6, siFZD7, siFZD8, siRYK, siROR2) or WNT5A plasmid-DNA (pcDNA3.1WNT5A), or treated with a combination of first siRNA (24 h) and afterwards WNT5A plasmid-DNA (24 h). Gene expression of WNT5A and receptors was analyzed using qPCR and normalized to GAPDH. Data are shown as mean  $\pm$  SD. \* $p$ <0.05; \*\* $p$ <0.01, \*\*\* $p$ <0.001 vs. control.

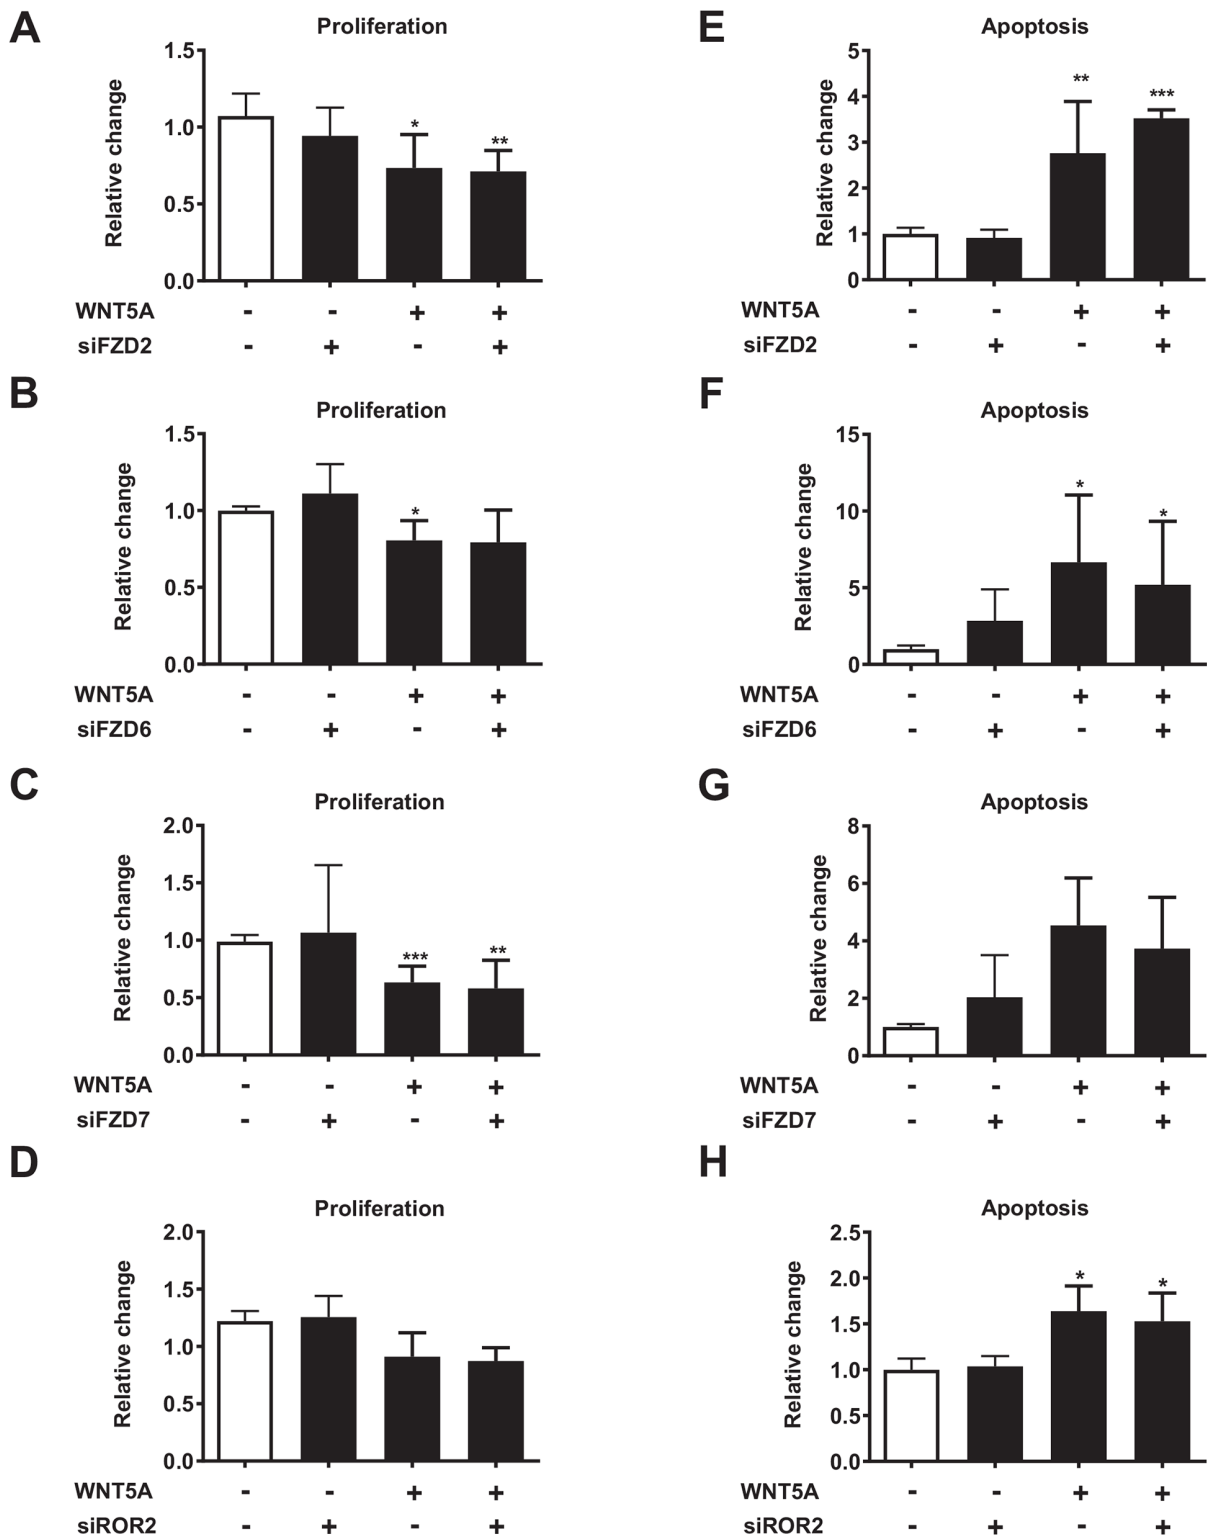

**Supplementary Figure 3: Effects of FZD2, FZ6, FZD7 and ROR2 knock-down and/or WNT5A overexpression in PC3 cells.** Cells were either single treated using siRNAs or WNT5A plasmid-DNA (pcDNA3.1WNT5A), or treated with a combination of first siRNAs (24 h) and afterwards WNT5A plasmid-DNA (24 h). **(A-D)** Proliferation of control (white bars) and treated (black) PC3 cells. Proliferation was measured using a BrdU proliferation assay after 48 h. **(E-H)** Caspase 3/7 activation of control (white bars) and treated (black) PC3 cells. Apoptosis was measured after 48 h with a Caspase Glo<sup>®</sup> 3/7 assay. Data are shown as mean ± SD. \*p<0.05; \*\*p<0.01, \*\*\*p<0.001. \* vs. control.

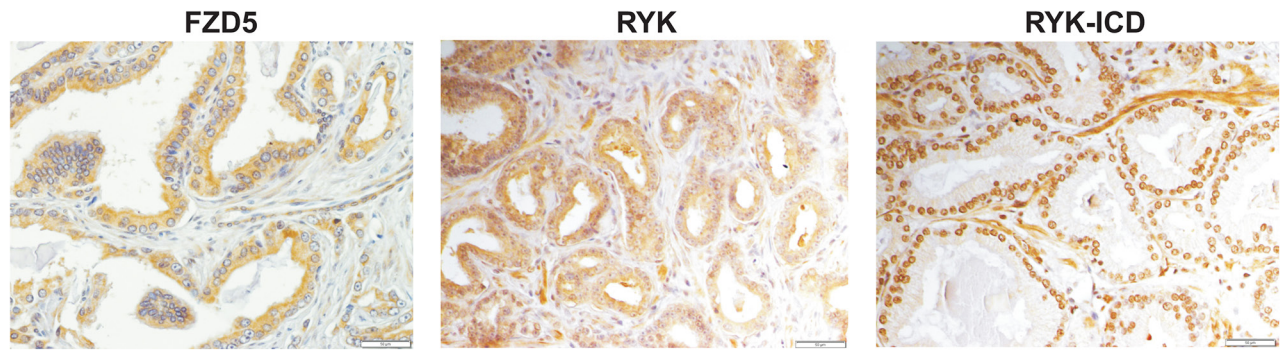

**Supplementary Figure 4: Immunohistochemical staining of prostate cancer tissue with FZD5 and RYK.** Images show representative staining for FZD5, RYK, and RYK-ICD (nuclear RYK). Scale bar: 50  $\mu$ m.

**Supplementary Table 1: Sequences of human and mouse primer used in this study**

| Gene  | Primer sequences 5'-3'                        | Gene           | Primer sequences 5'-3'                         |
|-------|-----------------------------------------------|----------------|------------------------------------------------|
| Human |                                               | Mouse          |                                                |
| FZD2  | CCCGACTTCACGGTCTACAT<br>CTGTTGGTGAGGCGAGTGTA  | FZD2           | GACTCGTTTTGCCCGTCTCT<br>ACCGTGAAGAAAGTGGAAGC   |
| FZD5  | AGCTAAAATGGCCAGAGCAA<br>AATCCCCCTGGAACTATG    | FZD5           | GACGCCGAGGTTCTGTGTAT<br>TCCTGGGAGTGTAGGTTTGG   |
| FZD6  | TTGTTGGCATCTCTGCTGTC<br>CCATGGATTTGGAAATGACC  | FZD6           | GAGTCCTGTGAGTTCTTCCTGA<br>ATGATTTGTGGTCGCTCCTG |
| FZD7  | CGACGCTCTTTACCGTTCTC<br>GCCATGCCGAAGAAGTAGAG  | FZD7           | GCTTCCTAGGTGAGCGTGAC<br>AACCCGACAGGAAGATGATG   |
| FZD8  | GACACTTGATGGGCTGAGGT<br>CAAATCTCGGGTTCTGGAAA  | FZD8           | CTGTTAGCTGGCTTCGTGTC<br>TGTAGAGCACGGTGAAGAGG   |
| ROR2  | GGGCAACCTTTCCA ACTACA<br>CGTTGCTCACATTGCTCACT | ROR2           | CTTCTGCCACTTCGTCTTCC<br>TCCAGCACCTCACATTCACT   |
| RYK   | TGATCGGTCTTGATGCAGAA<br>CCAGGTGAAGTGCAGGAAAT  | RYK            | TTAGCCGTTTTGCACCTTCA<br>TACTGGGTCGTCTGGGTAGA   |
| WNT5A | GGACCACATGCAGTACATCG<br>CCTGCCAAAAACAGAGGTGT  | WNT5A          | CCAACTGGCAGGACTTTCTC<br>GCATTCCTTGATGCCTGTCT   |
| GAPDH | AGCCACATCGCTCAGACAC<br>GCCCAATACGACCAAATCC    | $\beta$ -Actin | GATCTGGCACCACACCTTCT<br>GGGGTGTGAAGGTCTCAAA    |

FZD Frizzled; ROR Receptor tyrosine kinase-like orphan receptor; RYK Related to receptor tyrosine kinase.

**Supplementary Table 2: Summary of patient characteristics of the cDNA Array (n=48) and the TMA cohort (n=400)**

|                              | <b>Characteristics</b>   | <b>Median (IQR)</b>  |
|------------------------------|--------------------------|----------------------|
| <b>cDNA Array<br/>(n=48)</b> | Age at diagnosis (years) | 60 (54, 66)          |
|                              | <b>Staging</b>           | <b>Frequency (%)</b> |
|                              | Healthy                  | 9 (18.75)            |
|                              | Stage II                 | 18 (37.5)            |
|                              | Stage III                | 19 (39.58)           |
|                              | Stage IV                 | 2 (4.17)             |
|                              | <b>Gleason score</b>     | <b>Frequency (%)</b> |
|                              | Healthy                  | 9 (18.75)            |
|                              | < 7                      | 2 (4.17)             |
|                              | = 7                      | 23 (47.92)           |
| > 7                          | 14 (29.16)               |                      |
| <b>TMA<br/>(n=400)</b>       | Age at diagnosis (years) | 65 (61, 68)          |
|                              | Preoperative PSA (ng/ml) | 8.6 (5.54, 15.71)    |
|                              | <b>TNM staging</b>       | <b>Frequency (%)</b> |
|                              | pT2                      | 154 (38.5)           |
|                              | pT4                      |                      |
|                              | pN0                      | 294 (73.5)           |
|                              | pN1                      | 106 (26.5)           |
|                              | <b>Gleason score</b>     | <b>Frequency (%)</b> |
|                              | < 7                      | 78 (19.5)            |
|                              | = 7                      | 75 (18.75)           |
| > 7                          | 247 (61.75)              |                      |

IQR, Interquartile range; PSA, prostate-specific antigen; TNM, classification of malignant tumors.
